# Supplementary material for: Several energetic MOFs based on the N-rich energetic materials and alkali metals: towards high detonation performances and good stabilities
Source: Royal Society of Chemistry journal article supplement (doi:10.1039/d4ce00981a), 2024-12-05
Supplement: d4ce00981a1.pdf [file d4ce00981a1.pdf]

## Supporting Information

### **Several energetic MOFs based on the N-rich energetic materials and alkali metals: Towards high detonation performances and good stabilities**

Guofeng Zhang,<sup>a</sup> Xue Hao,<sup>a</sup> Yongbin Zou,<sup>a</sup> Shichang Liu,<sup>a</sup> Junjie Wei,<sup>a</sup> Zhen Dong<sup>\*a</sup> and Zhiwen Ye<sup>\*a</sup>

<sup>a</sup> School of Chemistry and Chemical Engineering, Nanjing University of Science and Technology, Xiaolingwei 200, Nanjing 210094, PR China

\*Corresponding Author: yezw@njust.edu.cn & dongzhen90@126.com

### **Table of Contents**

#### **1. X-ray crystallographic datas**

#### **2. IR and NMR Spectures**

#### **3. Computational Details**

#### **4. References**

## 1. X-ray crystallographic datas

[Na<sup>+</sup>(ATDT<sup>-</sup>)(H<sub>2</sub>O)<sub>2</sub>]:

**Table S1.** Crystallographic data for [Na<sup>+</sup>(ATDT<sup>-</sup>)(H<sub>2</sub>O)<sub>2</sub>].

|                                             |                                                                |
|---------------------------------------------|----------------------------------------------------------------|
| Empirical formula                           | C <sub>4</sub> H <sub>7</sub> N <sub>12</sub> NaO <sub>2</sub> |
| Formula weight                              | 278.21                                                         |
| Temperature/K                               | 223.00                                                         |
| Crystal system                              | orthorhombic                                                   |
| Space group                                 | Pbca                                                           |
| a/Å                                         | 12.5111(4)                                                     |
| b/Å                                         | 6.5119(2)                                                      |
| c/Å                                         | 26.0556(7)                                                     |
| α/°                                         | 90                                                             |
| β/°                                         | 90                                                             |
| γ/°                                         | 90                                                             |
| Volume/Å <sup>3</sup>                       | 2122.78(11)                                                    |
| Z                                           | 8                                                              |
| ρ <sub>calc</sub> /cm <sup>3</sup>          | 1.741                                                          |
| μ/mm <sup>-1</sup>                          | 1.578                                                          |
| F(000)                                      | 1136.0                                                         |
| Crystal size/mm <sup>3</sup>                | 0.15 × 0.13 × 0.11                                             |
| Radiation                                   | CuKα (λ = 1.54178)                                             |
| 2θ range for data collection/°              | 6.784 to 136.482                                               |
| Index ranges                                | -15 ≤ h ≤ 14, -7 ≤ k ≤ 6, -31 ≤ l ≤ 31                         |
| Reflections collected                       | 15454                                                          |
| Independent reflections                     | 1927 [R <sub>int</sub> = 0.0468, R <sub>sigma</sub> = 0.0238]  |
| Data/restraints/parameters                  | 1927/0/188                                                     |
| Goodness-of-fit on F <sup>2</sup>           | 1.070                                                          |
| Final R indexes [I >= 2σ (I)]               | R <sub>1</sub> = 0.0338, wR <sub>2</sub> = 0.0879              |
| Final R indexes [all data]                  | R <sub>1</sub> = 0.0413, wR <sub>2</sub> = 0.0926              |
| Largest diff. peak/hole / e Å <sup>-3</sup> | 0.20/-0.28                                                     |

CCDC: 2378833.

[K<sup>+</sup>(ATDT<sup>-</sup>)(H<sub>2</sub>O)]:

**Table S2.** Crystallographic data for [K<sup>+</sup>(ATDT<sup>-</sup>)(H<sub>2</sub>O)].

|                   |                                                  |
|-------------------|--------------------------------------------------|
| Empirical formula | C <sub>4</sub> H <sub>5</sub> KN <sub>12</sub> O |
| Formula weight    | 276.30                                           |
| Temperature/K     | 223.00                                           |
| Crystal system    | triclinic                                        |
| Space group       | P-1                                              |
| a/Å               | 6.7583(2)                                        |
| b/Å               | 7.8975(2)                                        |
| c/Å               | 9.8534(3)                                        |

|                                                |                                                               |
|------------------------------------------------|---------------------------------------------------------------|
| $\alpha/^\circ$                                | 85.648(2)                                                     |
| $\beta/^\circ$                                 | 73.651(2)                                                     |
| $\gamma/^\circ$                                | 87.923(2)                                                     |
| Volume/ $\text{\AA}^3$                         | 503.13(3)                                                     |
| Z                                              | 2                                                             |
| $\rho_{\text{calc}}/\text{cm}^3$               | 1.824                                                         |
| $\mu/\text{mm}^{-1}$                           | 4.827                                                         |
| F(000)                                         | 280.0                                                         |
| Crystal size/ $\text{mm}^3$                    | $0.13 \times 0.12 \times 0.11$                                |
| Radiation                                      | CuK $\alpha$ ( $\lambda = 1.54178$ )                          |
| 2 $\theta$ range for data collection/ $^\circ$ | 9.376 to 158.122                                              |
| Index ranges                                   | $-8 \leq h \leq 7, -9 \leq k \leq 10, -11 \leq l \leq 12$     |
| Reflections collected                          | 6944                                                          |
| Independent reflections                        | 2084 [ $R_{\text{int}} = 0.0483, R_{\text{sigma}} = 0.0429$ ] |
| Data/restraints/parameters                     | 2084/0/164                                                    |
| Goodness-of-fit on $F^2$                       | 1.056                                                         |
| Final R indexes [ $I > 2\sigma(I)$ ]           | $R_1 = 0.0391, wR_2 = 0.1035$                                 |
| Final R indexes [all data]                     | $R_1 = 0.0480, wR_2 = 0.1105$                                 |
| Largest diff. peak/hole / $e \text{\AA}^{-3}$  | 0.33/-0.44                                                    |

CCDC: 2385568.

**[Cs<sup>+</sup>(ATDT<sup>-</sup>):**

**Table S3.** Crystallographic data for **[Cs<sup>+</sup>(ATDT<sup>-</sup>)].**

|                                                |                                                 |
|------------------------------------------------|-------------------------------------------------|
| Empirical formula                              | C <sub>4</sub> H <sub>3</sub> CsN <sub>12</sub> |
| Formula weight                                 | 352.09                                          |
| Temperature/K                                  | 223.00                                          |
| Crystal system                                 | triclinic                                       |
| Space group                                    | P-1                                             |
| a/ $\text{\AA}$                                | 7.6704(2)                                       |
| b/ $\text{\AA}$                                | 8.0941(3)                                       |
| c/ $\text{\AA}$                                | 8.4392(3)                                       |
| $\alpha/^\circ$                                | 90.8660(10)                                     |
| $\beta/^\circ$                                 | 109.2380(10)                                    |
| $\gamma/^\circ$                                | 92.4870(10)                                     |
| Volume/ $\text{\AA}^3$                         | 493.98(3)                                       |
| Z                                              | 2                                               |
| $\rho_{\text{calc}}/\text{cm}^3$               | 2.367                                           |
| $\mu/\text{mm}^{-1}$                           | 3.750                                           |
| F(000)                                         | 332.0                                           |
| Crystal size/ $\text{mm}^3$                    | $0.13 \times 0.12 \times 0.11$                  |
| Radiation                                      | MoK $\alpha$ ( $\lambda = 0.71073$ )            |
| 2 $\theta$ range for data collection/ $^\circ$ | 5.04 to 50.642                                  |

|                                             |                                       |
|---------------------------------------------|---------------------------------------|
| Index ranges                                | -9 ≤ h ≤ 9, -9 ≤ k ≤ 9, -10 ≤ l ≤ 10  |
| Reflections collected                       | 10547                                 |
| Independent reflections                     | 1790 [Rint = 0.0367, Rsigma = 0.0226] |
| Data/restraints/parameters                  | 1790/0/154                            |
| Goodness-of-fit on F2                       | 1.052                                 |
| Final R indexes [ $I \geq 2\sigma(I)$ ]     | R1 = 0.0174, wR2 = 0.0434             |
| Final R indexes [all data]                  | R1 = 0.0183, wR2 = 0.0438             |
| Largest diff. peak/hole / e Å <sup>-3</sup> | 0.87/-0.38                            |

---

CCDC: 2376608.

## 2. IR and NMR Spectures

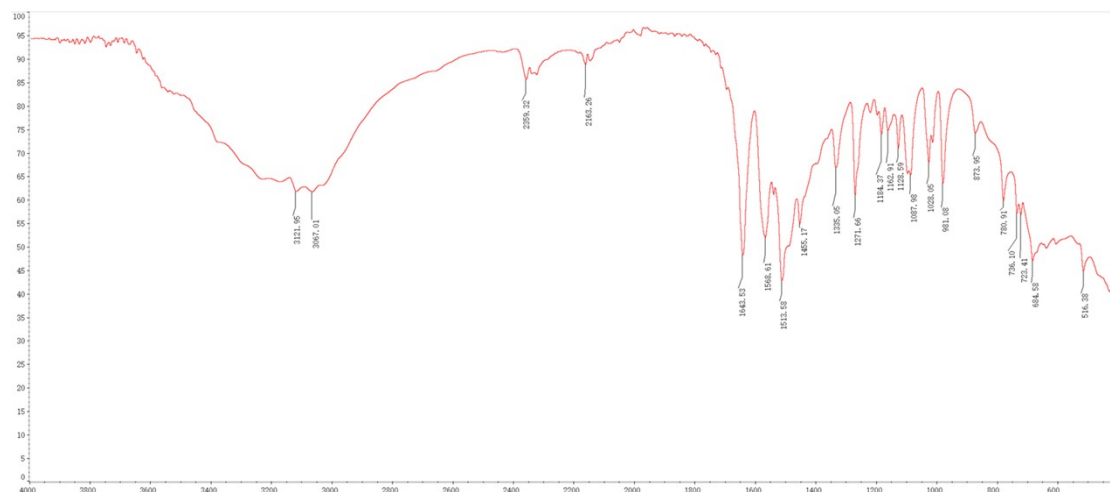

Figure S1. IR spectra of ATDT-Li.

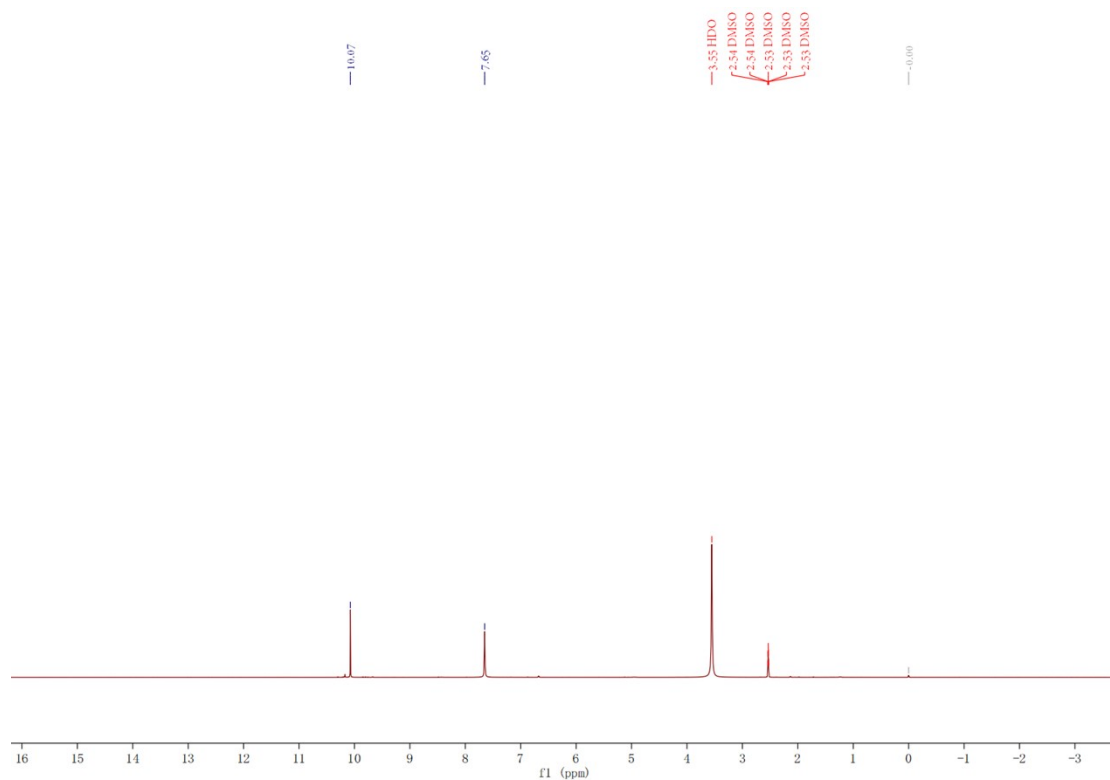

Figure S2. <sup>1</sup>H NMR spectra of ATDT-Li.

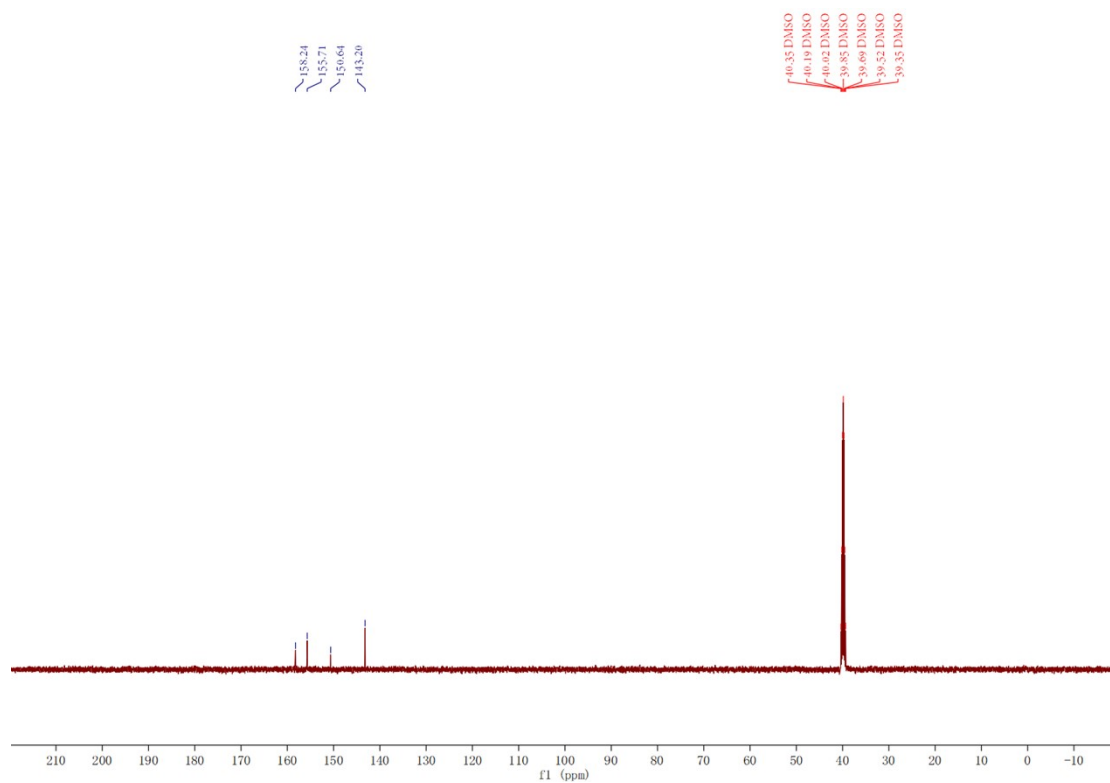

**Figure S3.**  $^{13}\text{C}$  NMR spectra of ATDT-Li.

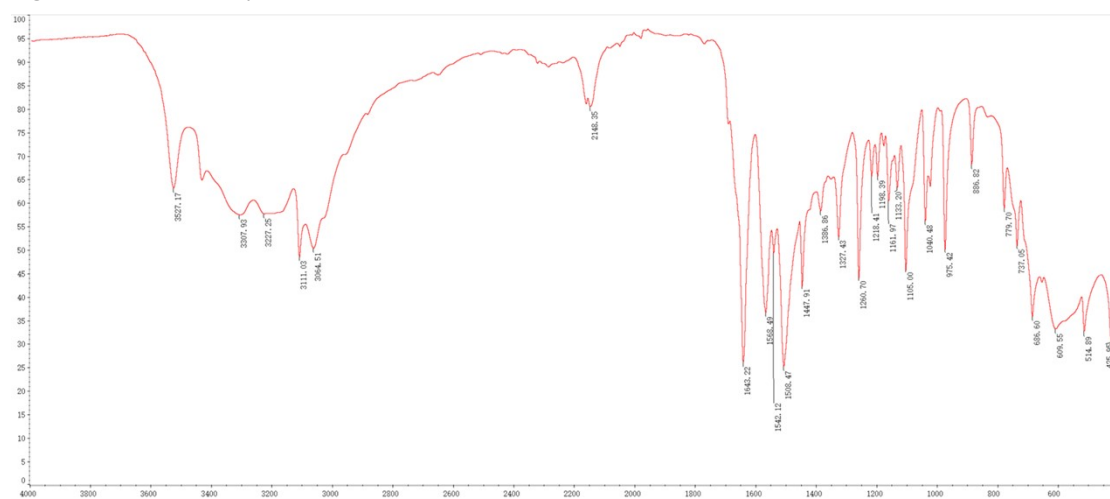

**Figure S4.** IR spectra of ATDT-Na.

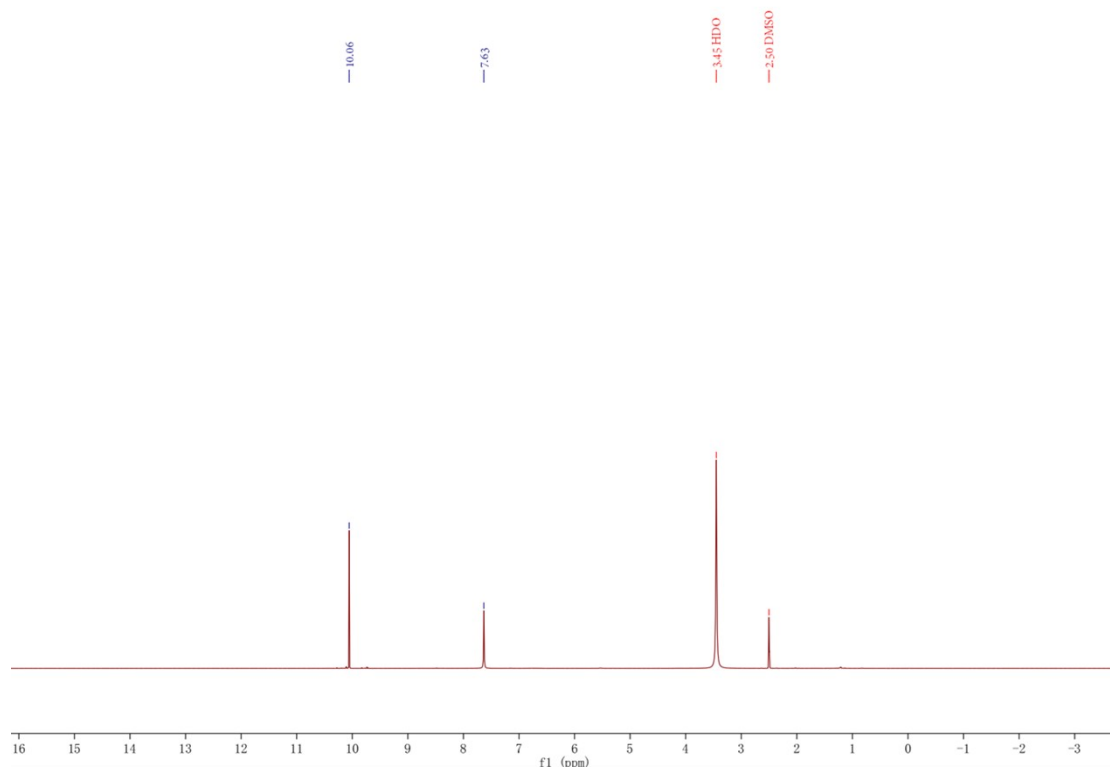

Figure S5. <sup>1</sup>H NMR spectra of ATDT-Na.

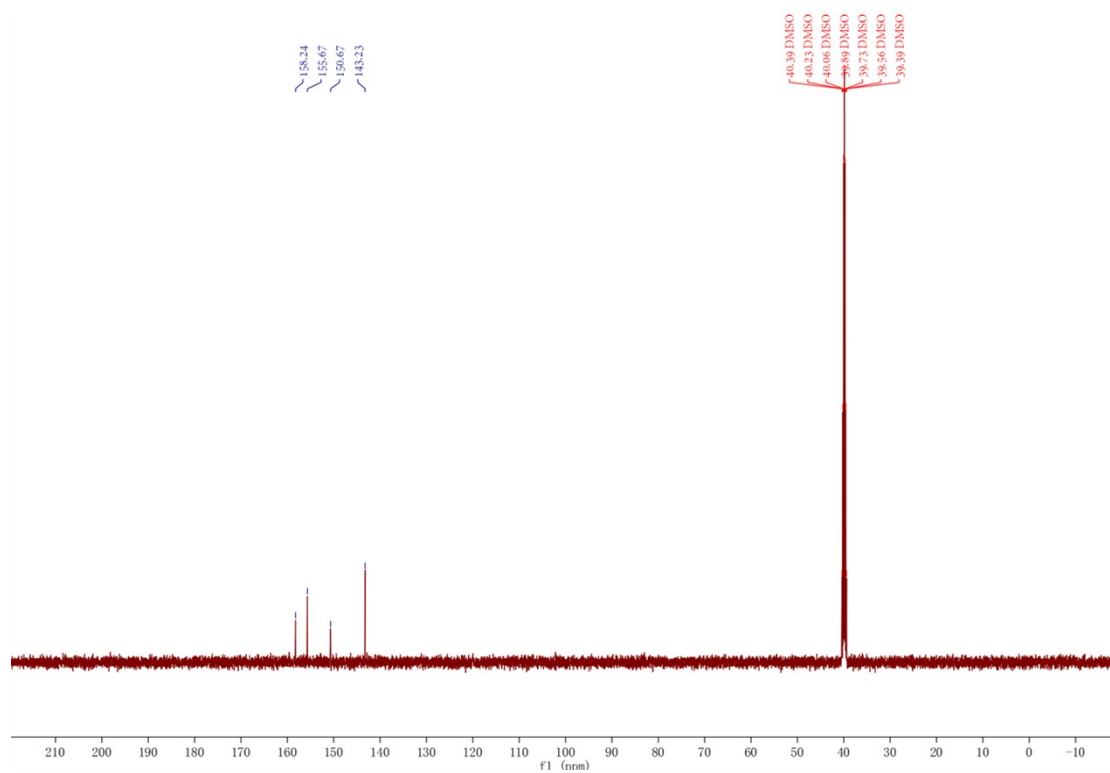

Figure S6. <sup>13</sup>C NMR spectra of ATDT-Na.

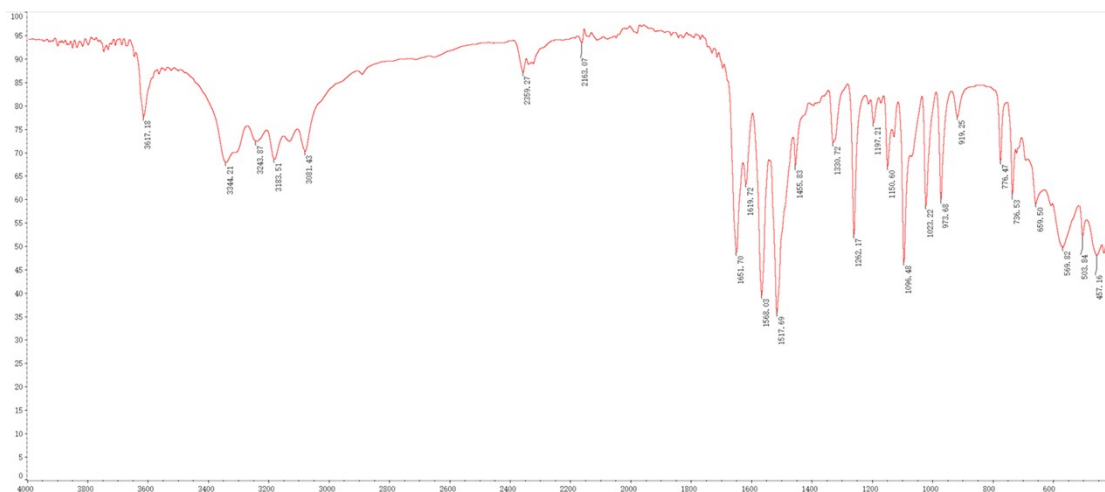

Figure S7. IR spectra of ATDT-K.

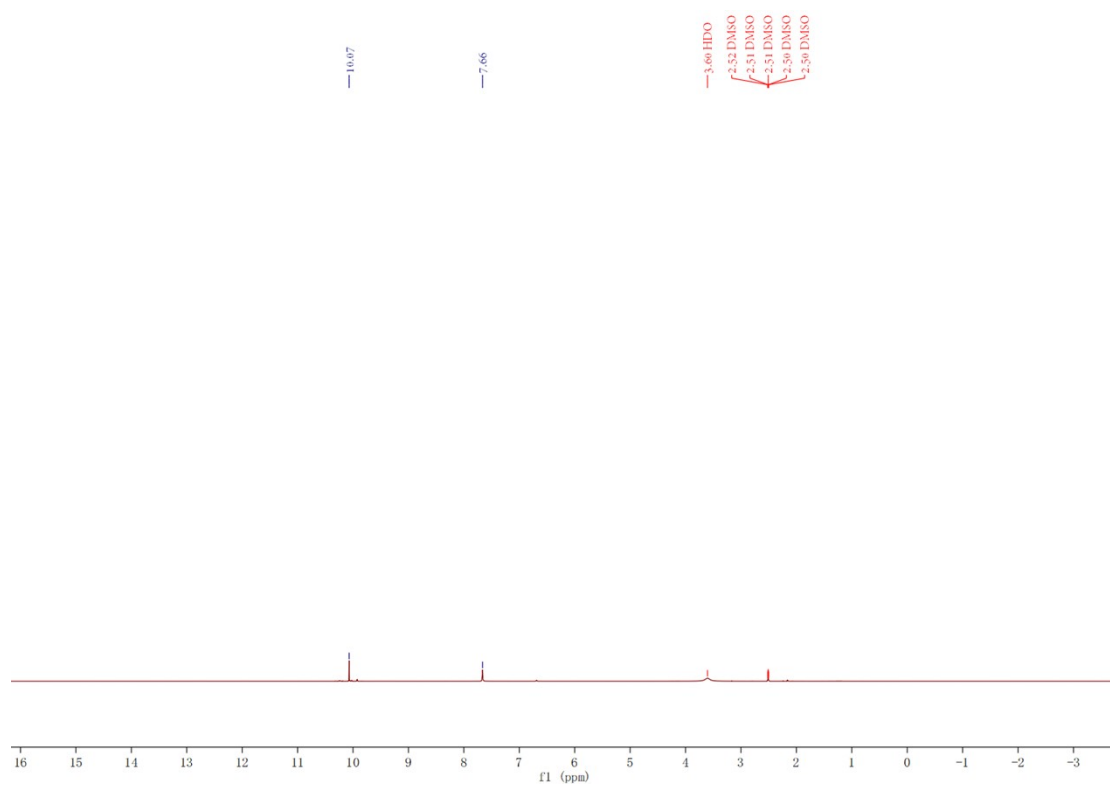

Figure S8. <sup>1</sup>H NMR spectra of ATDT-K.



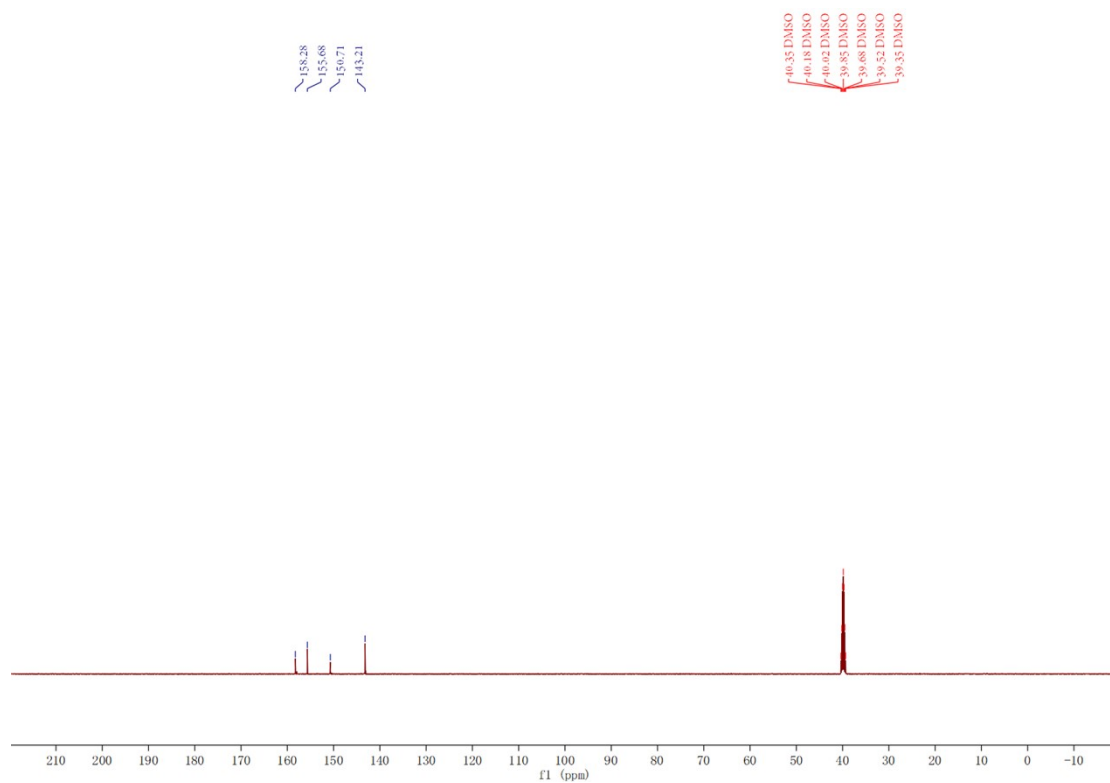

Figure S9.  $^{13}\text{C}$  NMR spectra of ATDT-K.

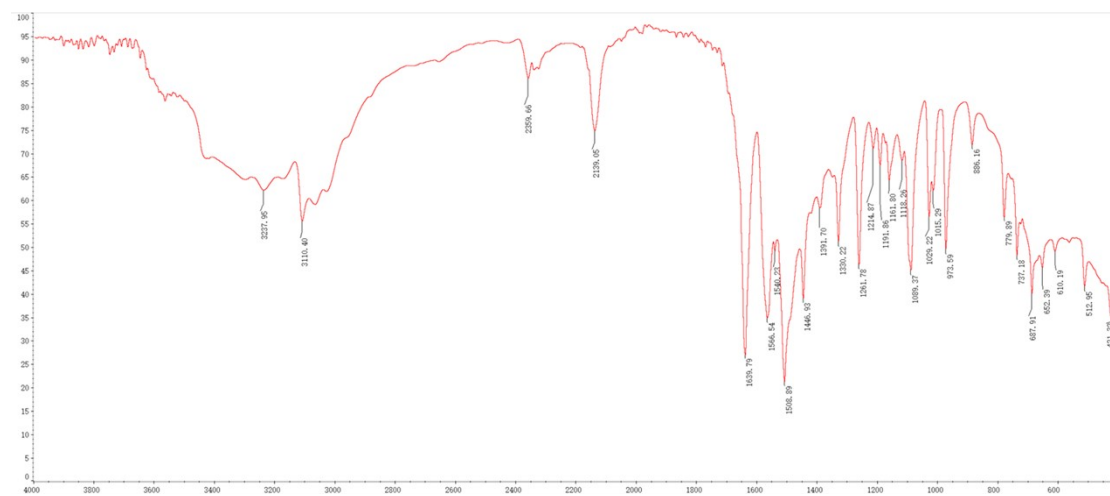

Figure S10. IR spectra of ATDT-Rb.

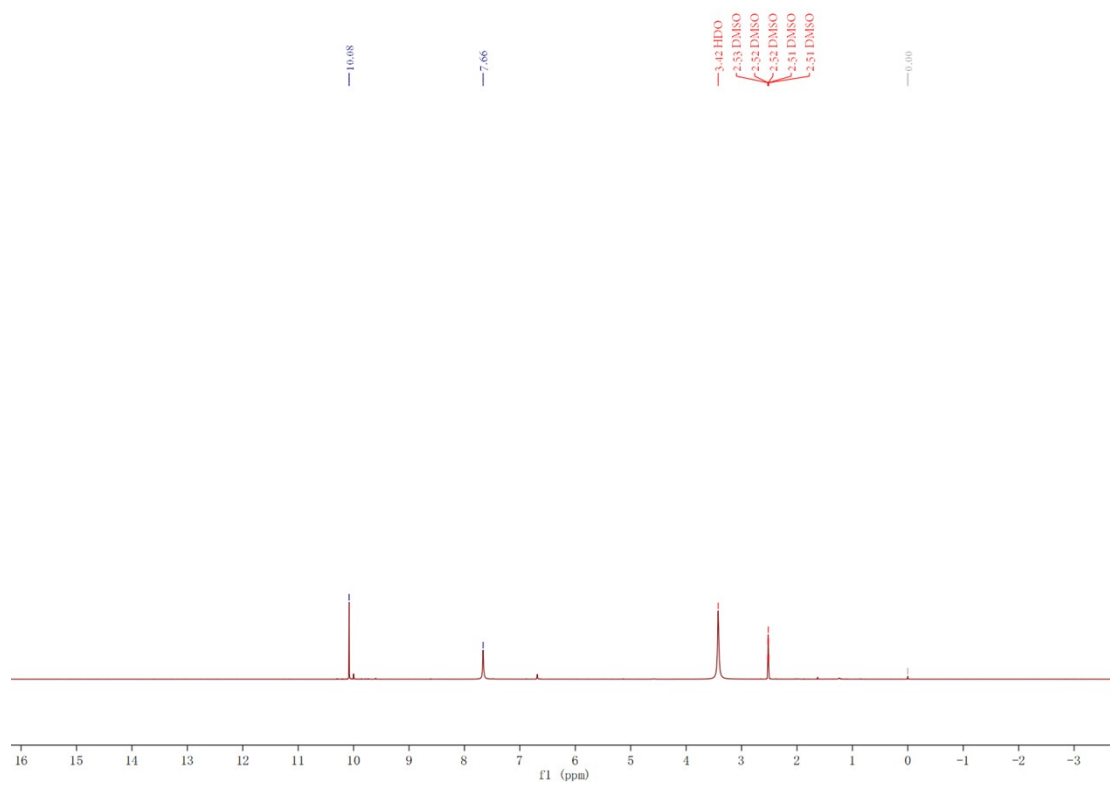

Figure S11. <sup>1</sup>H NMR spectra of ATDT-Rb.

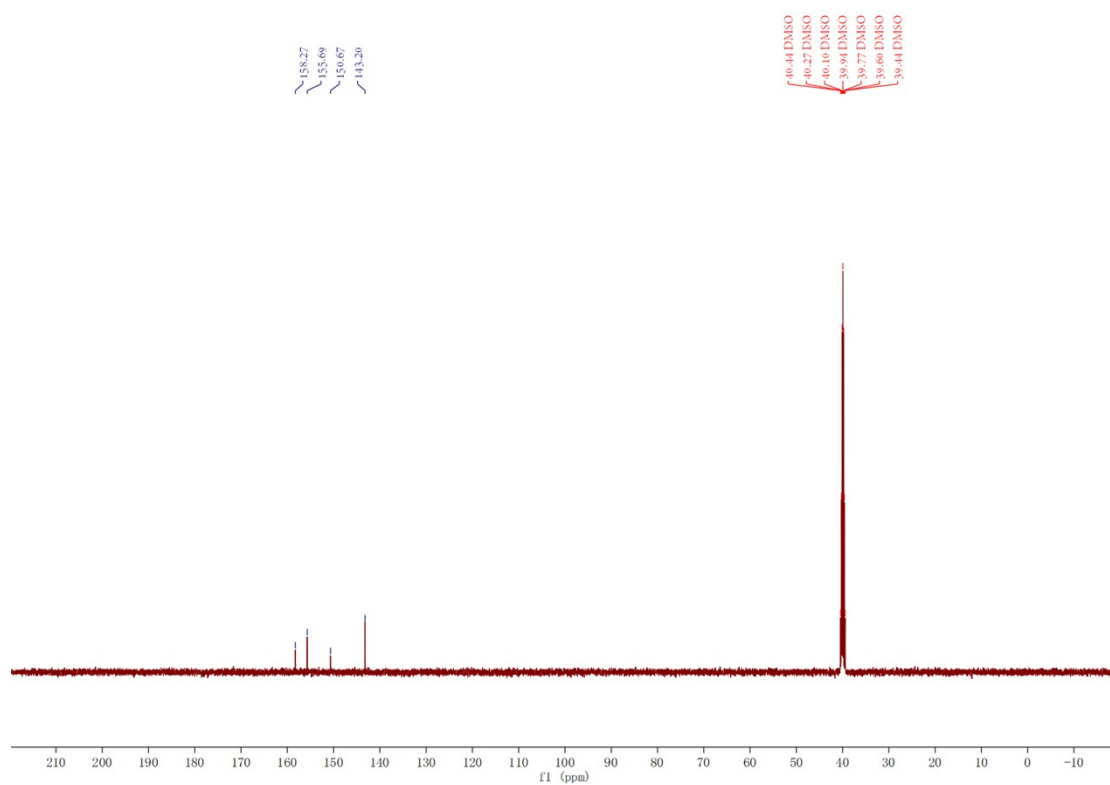

Figure S12. <sup>13</sup>C NMR spectra of ATDT-Rb.

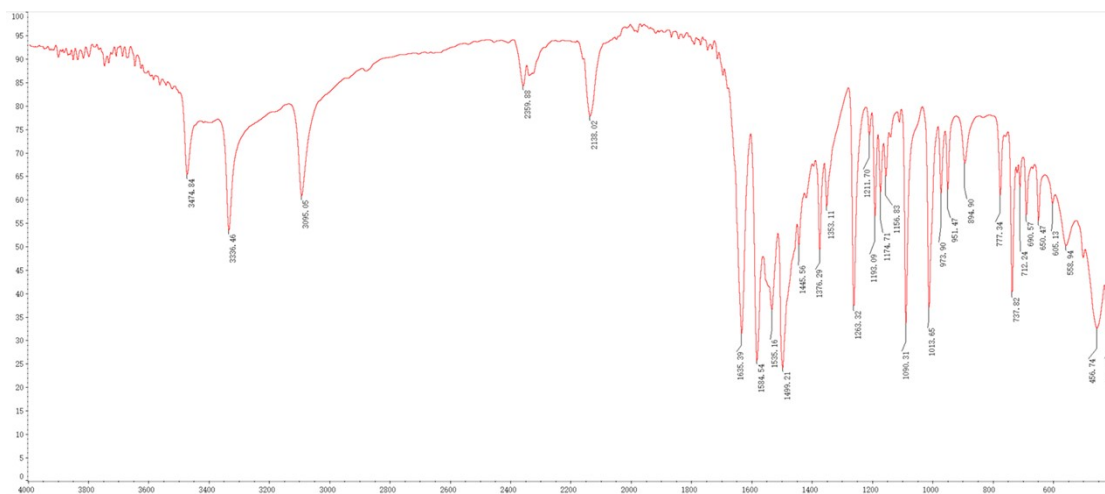

Figure S13. IR spectra of ATDT-Cs.

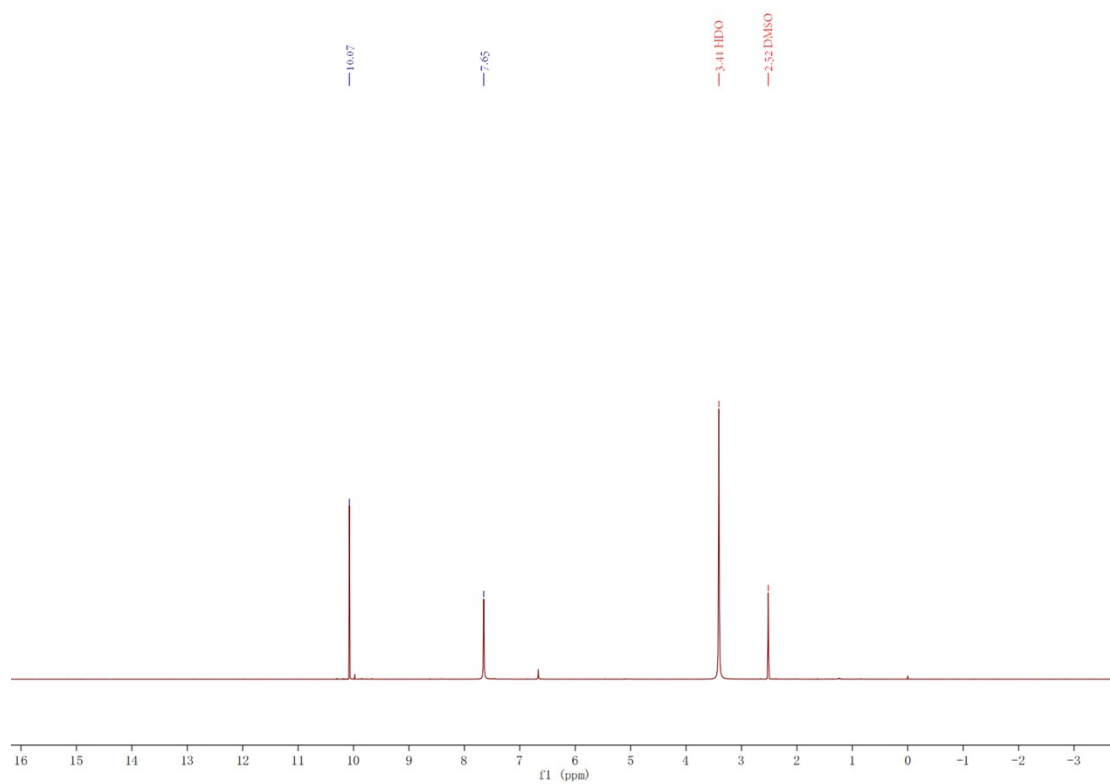

Figure S14. <sup>1</sup>H NMR spectra of ATDT-Cs.

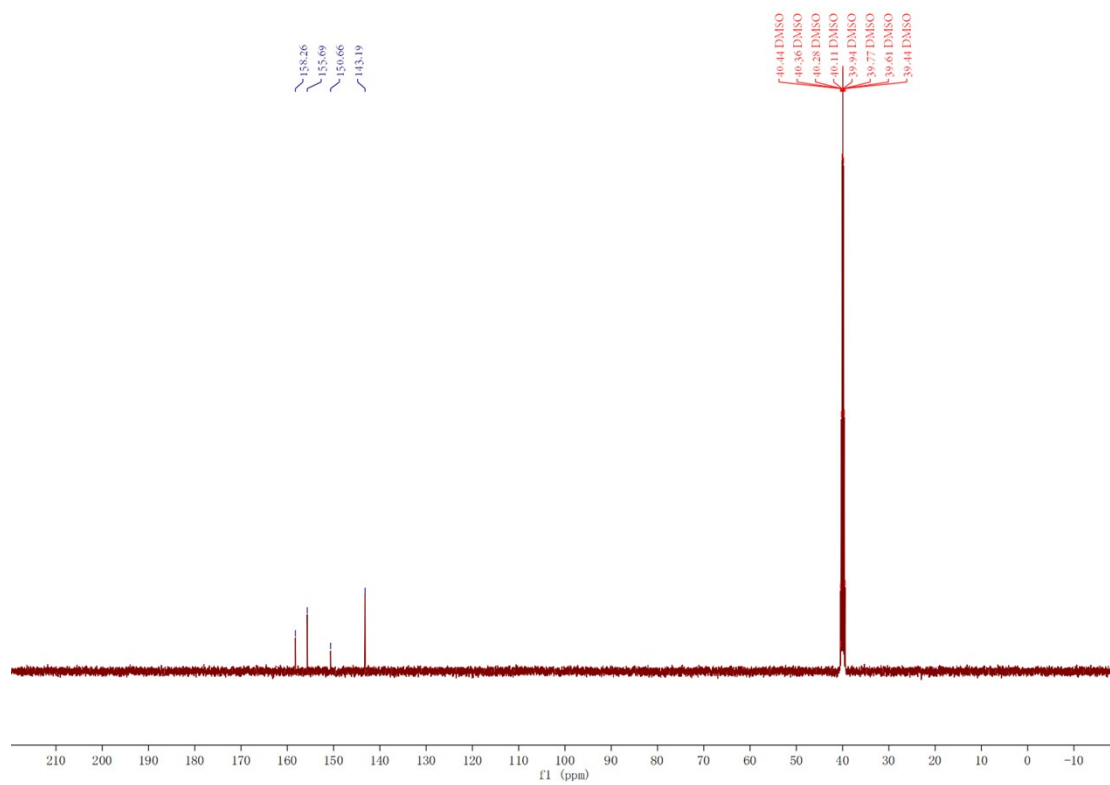

Figure S15.  $^{13}\text{C}$  NMR spectra of ATDT-Cs.

### 3. Computational Details

Computations were carried out by using the Gaussian 16 suite of programs.<sup>1</sup> The theoretical gas phase enthalpies of formation were calculated used the hybrid DFTB3LYP methods with 6-311++G\*\* basis set based on isodemic reactions (**Scheme S1**).

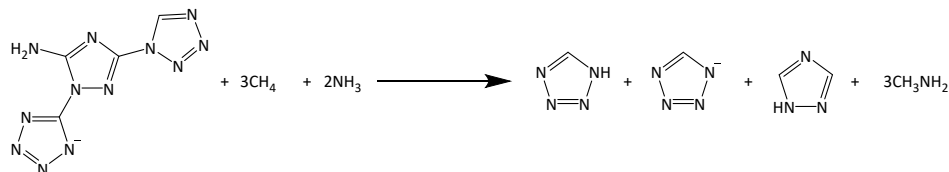

**Scheme S1** Isodesmic reactions for calculating heats of formation.

For energetic salts, the solid-phase heat of formation is calculated based on a Born-Haber energy cycle (Figure S16)<sup>2</sup>.

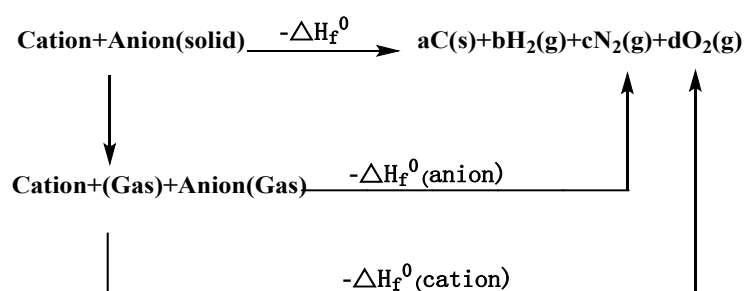

**Figure S16.** Born-Haber Cycle for the formation of energetic salts.

The number is simplified by equation 1:

$$H_f^0(\text{salt}, 298\text{ K}) = H_f^0(\text{cation}, 298\text{ K}) + H_f^0(\text{anion}, 298\text{ K}) - H_L \quad (1)$$

where  $H_L$  is the lattice energy of the salts, which could be predicted by using the formula suggested by Jenkins et al. [Eq. (2)]

$$H_L = U_{\text{POT}} + [p(n_M/2 - 2) + q(n_X/2 - 2)]RT \quad (2)$$

where  $n_M$  and  $n_X$  depend on the nature of the ions,  $M^{q+}$  and  $X^{p-}$ , and are equal to 3 for monatomic ions, 5 for linear polyatomic ions, and 6 for nonlinear polyatomic ions.

The equation for lattice potential energy  $U_{\text{POT}}$  [Eq. (3)] has the form:

$$U_{\text{POT}} [\text{kJ mol}^{-1}] = \gamma(\rho_m/M_m)^{1/3} + \delta \quad (3)$$

where  $\rho_m$  [g cm<sup>-3</sup>] is the density of the salt,  $M_m$  is the chemical formula mass of the ionic material, and values for  $\gamma$  (kJ mol<sup>-1</sup> cm) and  $\delta$  (kJ mol<sup>-1</sup>) are assigned literature values.<sup>3</sup>

The solid-state enthalpy of formation for neutral compound can be estimated by subtracting the heat of sublimation from gas-phase heat of formation. Based on the literature,<sup>4</sup> the heat of sublimation can be estimated with Trouton's rule according to supplementary equation (4), where  $T$  represents either the melting point or the decomposition temperature when no melting occurs prior to decomposition:

$$\Delta H_{\text{sub}} = 188/\text{J mol}^{-1}\text{K}^{-1} \times T \quad (4)$$

#### 4. References

- (1) Gaussian 16, Revision A.03, M. J. Frisch, G. W. Trucks, H. B. Schlegel, G. E. Scuseria, M. A. Robb, J. R. Cheeseman, G. Scalmani, V. Barone, G. A. Petersson, H. Nakatsuji, X. Li, M. Caricato, A. V. Marenich, J. Bloino, B. G. Janesko, R. Gomperts, B. Mennucci, H. P. Hratchian, J. V. Ortiz, A. F. Izmaylov, J. L. Sonnenberg, D. Williams-Young, F. Ding, F. Lipparini, F. Egidi, J. Goings, B. Peng, A. Petrone, T. Henderson, D. Ranasinghe, V. G. Zakrzewski, J. Gao, N. Rega, G. Zheng, W. Liang, M. Hada, M. Ehara, K. Toyota, R. Fukuda, J. Hasegawa, M. Ishida, T. Nakajima, Y. Honda, O. Kitao, H. Nakai, T. Vreven, K. Throssell, J. A. Montgomery, Jr., J. E. Peralta, F. Ogliaro, M. J. Bearpark, J. J. Heyd, E. N. Brothers, K. N. Kudin, V. N. Staroverov, T. A. Keith, R. Kobayashi, J. Normand, K. Raghavachari, A. P. Rendell, J. C. Burant, S. S. Iyengar, J. Tomasi, M. Cossi, J. M. Millam, M. Klene, C. Adamo, R. Cammi, J. W. Ochterski, R. L. Martin, K. Morokuma, O. Farkas, J. B. Foresman, and D. J. Fox, *Gaussian, Inc.*, Wallingford CT, 2016.
- (2) Hariharan, P. C.; Pople, J. A. *Theor. Chim. Acta.* **1973**, 28, 213-222.
